# Supplementary material for: Antagonistic Effects of Sublethal Concentrations of Certain Mixtures of Metal Oxide Nanoparticles and the Bulk (Al2O3, CuO, and SiO2) on Gill Histology inClarias gariepinus
Source: Hindawi journal article supplement (doi:10.1155/2019/7686597), 2019-06-12
Supplement: f1 [file 7686597.f1.pdf]

## SUPPLEMENTARY MATERIALS (APPENDICES)

Tables 4 to 7 are supplementary materials used in calculating and estimating Tables 2 and 3. Tables 4-7 are summarized in Tables 2 and 3 as presented in the main document.

Table 4: 28 day Single Exposure of *Clarias gariepinus* to nano and bulk metals.

| Score | Histological Alteration                                                                                                                                                                                                                                                                                         | nano SiO | bulk SiO | nano CuO | bulk CuO | nano Al <sub>2</sub> O <sub>3</sub> | bulk Al <sub>2</sub> O <sub>3</sub> |
|-------|-----------------------------------------------------------------------------------------------------------------------------------------------------------------------------------------------------------------------------------------------------------------------------------------------------------------|----------|----------|----------|----------|-------------------------------------|-------------------------------------|
| 0     | No lesion or any alteration (NT)                                                                                                                                                                                                                                                                                |          |          |          |          |                                     |                                     |
| 2.0   | Mild thickening of Gill lamella (GL1)<br>Epithelial Hyperplasia (EH)<br>Hypertrophy (HPT)                                                                                                                                                                                                                       |          | **       |          |          | **                                  |                                     |
| 4.0   | Moderate thickening of Gill lamella (GL2)<br>Oedema (OD)                                                                                                                                                                                                                                                        | **       | **       | **       |          |                                     |                                     |
| 6.0   | Eroded outer operculum (ERO)<br>Epithelial lifting (EPL)<br>Partial Fusion of secondary lamellae (FSGL1)<br>Erosion of Gill lamellae (EGL)<br>Shortening of secondary lamellae (SSGL)<br>Stunted Gill lamellae (SGL)<br>Blunt secondary lamellae (BSGL)<br>Uncontrolled proliferation of epithelial cells (PEC) | **       |          | **       |          |                                     | **                                  |
| 8.0   | Severe thickening of Gill lamella (GL3)<br>Complete Fusion of secondary lamellae (FSGL1)<br>Aneurysm (ANS)                                                                                                                                                                                                      |          |          |          | **       |                                     |                                     |
| 10.0  | Necrosis (N)<br>Total damage to the lamellae (TDL)                                                                                                                                                                                                                                                              |          |          |          | **       |                                     |                                     |

Table 5: 28 day Joint Exposure of *Clarias gariepinus* to nano and bulk metals at the Equal ratio.

| Score | Histological Alteration                                                                                                                                                                                                                                                                                         | Ratio 1 to 1 |              |                                         |                                         |                                          |                                          |
|-------|-----------------------------------------------------------------------------------------------------------------------------------------------------------------------------------------------------------------------------------------------------------------------------------------------------------------|--------------|--------------|-----------------------------------------|-----------------------------------------|------------------------------------------|------------------------------------------|
|       |                                                                                                                                                                                                                                                                                                                 | nano SiO+CuO | bulk SiO+CuO | nano SiO+Al <sub>2</sub> O <sub>3</sub> | bulk SiO+Al <sub>2</sub> O <sub>3</sub> | nano Al <sub>2</sub> O <sub>3</sub> +CuO | bulk Al <sub>2</sub> O <sub>3</sub> +CuO |
| 0     | No lesion or any alteration (NT)                                                                                                                                                                                                                                                                                |              |              |                                         |                                         |                                          |                                          |
| 2.0   | Mild thickening of Gill lamella (GL1)<br>Epithelial Hyperplasia (EH)<br>Hypertrophy (HPT)                                                                                                                                                                                                                       |              | **           | **                                      |                                         |                                          |                                          |
| 4.0   | Moderate thickening of Gill lamella (GL2)<br>Oedema (OD)                                                                                                                                                                                                                                                        |              |              |                                         |                                         | **                                       | **                                       |
| 6.0   | Eroded outer operculum (ERO)<br>Epithelial lifting (EPL)<br>Partial Fusion of secondary lamellae (FSGL1)<br>Erosion of Gill lamellae (EGL)<br>Shortening of secondary lamellae (SSGL)<br>Stunted Gill lamellae (SGL)<br>Blunt secondary lamellae (BSGL)<br>Uncontrolled proliferation of epithelial cells (PEC) | **           | **           |                                         | **                                      |                                          |                                          |
| 8.0   | Severe thickening of Gill lamella (GL3)<br>Complete Fusion of secondary lamellae (FSGL1)<br>Aneurysm (ANS)                                                                                                                                                                                                      |              |              |                                         |                                         | **                                       | **                                       |
| 10.0  | Necrosis (N)<br>Total damage to the lamellae (TDL)                                                                                                                                                                                                                                                              |              |              |                                         |                                         |                                          | **                                       |

Table 6: 28 day Joint Exposure of *Clarias gariepinus* to nano and bulk metals at Unequal ratio.

| Score | Histological Alteration                                                                                                                                                                                                                                                                                         | Ratio 1 to 2 |              |                                         |                                         | Ratio 2 to 1                            |                                         |                                          |                                          |
|-------|-----------------------------------------------------------------------------------------------------------------------------------------------------------------------------------------------------------------------------------------------------------------------------------------------------------------|--------------|--------------|-----------------------------------------|-----------------------------------------|-----------------------------------------|-----------------------------------------|------------------------------------------|------------------------------------------|
|       |                                                                                                                                                                                                                                                                                                                 | nano SiO+CuO | bulk SiO+CuO | nano SiO+Al <sub>2</sub> O <sub>3</sub> | bulk SiO+Al <sub>2</sub> O <sub>3</sub> | nano SiO+Al <sub>2</sub> O <sub>3</sub> | bulk SiO+Al <sub>2</sub> O <sub>3</sub> | nano Al <sub>2</sub> O <sub>3</sub> +CuO | bulk Al <sub>2</sub> O <sub>3</sub> +CuO |
| 0     | No lesion or any alteration (NT)                                                                                                                                                                                                                                                                                |              |              |                                         |                                         |                                         |                                         |                                          |                                          |
| 2.0   | Mild thickening of Gill lamella (GL1)<br>Epithelial Hyperplasia (EH)<br>Hypertrophy (HPT)                                                                                                                                                                                                                       |              | **<br>**     |                                         |                                         | **                                      | **<br>**                                | **                                       | **                                       |
| 4.0   | Moderate thickening of Gill lamella (GL2)<br>Oedema (OD)                                                                                                                                                                                                                                                        |              |              |                                         |                                         |                                         |                                         | **                                       | **                                       |
| 6.0   | Eroded outer operculum (ERO)<br>Epithelial lifting (EPL)<br>Partial Fusion of secondary lamellae (FSGL1)<br>Erosion of Gill lamellae (EGL)<br>Shortening of secondary lamellae (SSGL)<br>Stunted Gill lamellae (SGL)<br>Blunt secondary lamellae (BSGL)<br>Uncontrolled proliferation of epithelial cells (PEC) | **           |              | **                                      |                                         | **                                      |                                         |                                          |                                          |
| 8.0   | Severe thickening of Gill lamella (GL3)<br>Complete Fusion of secondary lamellae (FSGL1)<br>Aneurysm (ANS)                                                                                                                                                                                                      |              |              |                                         |                                         |                                         |                                         |                                          |                                          |
| 10.0  | Necrosis (N)<br>Total damage to the lamellae (TDL)                                                                                                                                                                                                                                                              |              | **           | **                                      | **                                      |                                         |                                         |                                          |                                          |

Table 7: 28 day Joint Exposure of *Clarias gariepinus* to nano and bulk metals at Equal ratio.

| Score | Histological Alteration                                                                                                                                                                                                                                                                                         | Ratio 1 to 1 to 1                           |                                             |
|-------|-----------------------------------------------------------------------------------------------------------------------------------------------------------------------------------------------------------------------------------------------------------------------------------------------------------------|---------------------------------------------|---------------------------------------------|
|       |                                                                                                                                                                                                                                                                                                                 | nano SiO+CuO+Al <sub>2</sub> O <sub>3</sub> | bulk SiO+CuO+Al <sub>2</sub> O <sub>3</sub> |
| 0     | No lesion or any alteration (NT)                                                                                                                                                                                                                                                                                |                                             |                                             |
| 2.0   | Mild thickening of Gill lamella (GL1)<br>Epithelial Hyperplasia (EH)<br>Hypertrophy (HPT)                                                                                                                                                                                                                       |                                             |                                             |
| 4.0   | Moderate thickening of Gill lamella (GL2)<br>Oedema (OD)                                                                                                                                                                                                                                                        |                                             |                                             |
| 6.0   | Eroded outer operculum (ERO)<br>Epithelial lifting (EPL)<br>Partial Fusion of secondary lamellae (FSGL1)<br>Erosion of Gill lamellae (EGL)<br>Shortening of secondary lamellae (SSGL)<br>Stunted Gill lamellae (SGL)<br>Blunt secondary lamellae (BSGL)<br>Uncontrolled proliferation of epithelial cells (PEC) | **                                          | **<br>**                                    |
| 8.0   | Severe thickening of Gill lamella (GL3)<br>Complete Fusion of secondary lamellae (FSGL1)<br>Aneurysm (ANS)                                                                                                                                                                                                      |                                             |                                             |
| 10.0  | Necrosis (N)<br>Total damage to the lamellae (TDL)                                                                                                                                                                                                                                                              |                                             |                                             |
